# Supplementary material for: Modification of TiO2 nanotubes with 3-aminopropyl triethoxysilane and its performances in nanocomposite coatings
Source: Royal Society of Chemistry journal article supplement (doi:10.1039/c8nj00642c), 2018-01-01
Supplement: c8nj00642c1.pdf [file c8nj00642c1.pdf]

## Electronic Supplementary Information

### Modification of TiO<sub>2</sub> nanotubes with 3-aminopropyl triethoxysilane and its performances in nanocomposite coatings

HongPhan Duong,<sup>a</sup> Chia-Hsiang Hung,<sup>b</sup> HungCuong Dao,<sup>c</sup> MinhDuc Le<sup>d</sup> and Chia-Yun Chen<sup>\*b</sup>

<sup>a</sup> The University of Danang, University of Science and Technology, 54 Nguyen Luong Bang, Vietnam

<sup>b</sup> Department of Materials Science and Engineering, National Cheng Kung University, Tainan 701, Taiwan.

<sup>c</sup> The University of Danang, University of Education, 459 Ton DucThang, Vietnam

<sup>d</sup> Institute of Occupational Safety and Health & Environmental Protection in Central of Viet Nam, 178 Trieu Nu Vuong, Vietnam

(a)

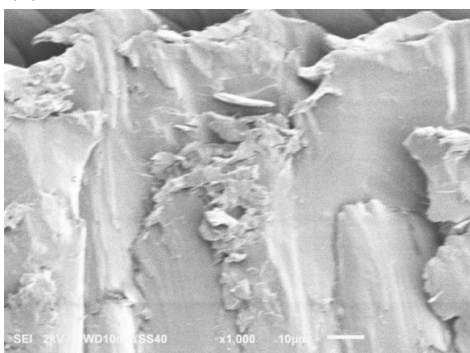

(b)

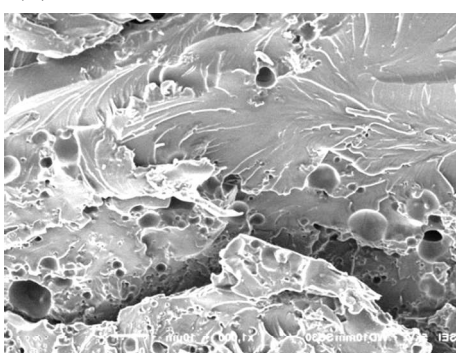

Figure S1 Representative SEM images of the nano-epoxy coatings with (a) 5 wt % APTS-grafted TiO<sub>2</sub> nanotube and (b) 5 wt % TiO<sub>2</sub> nanotubes.
